# Supplementary material for: Survivors of Ebola Virus Disease Develop Polyfunctional Antibody Responses
Source: PubMed Central journal article supplement (PMC7184900; doi:10.1093/infdis/jiz364), 2019-07-12

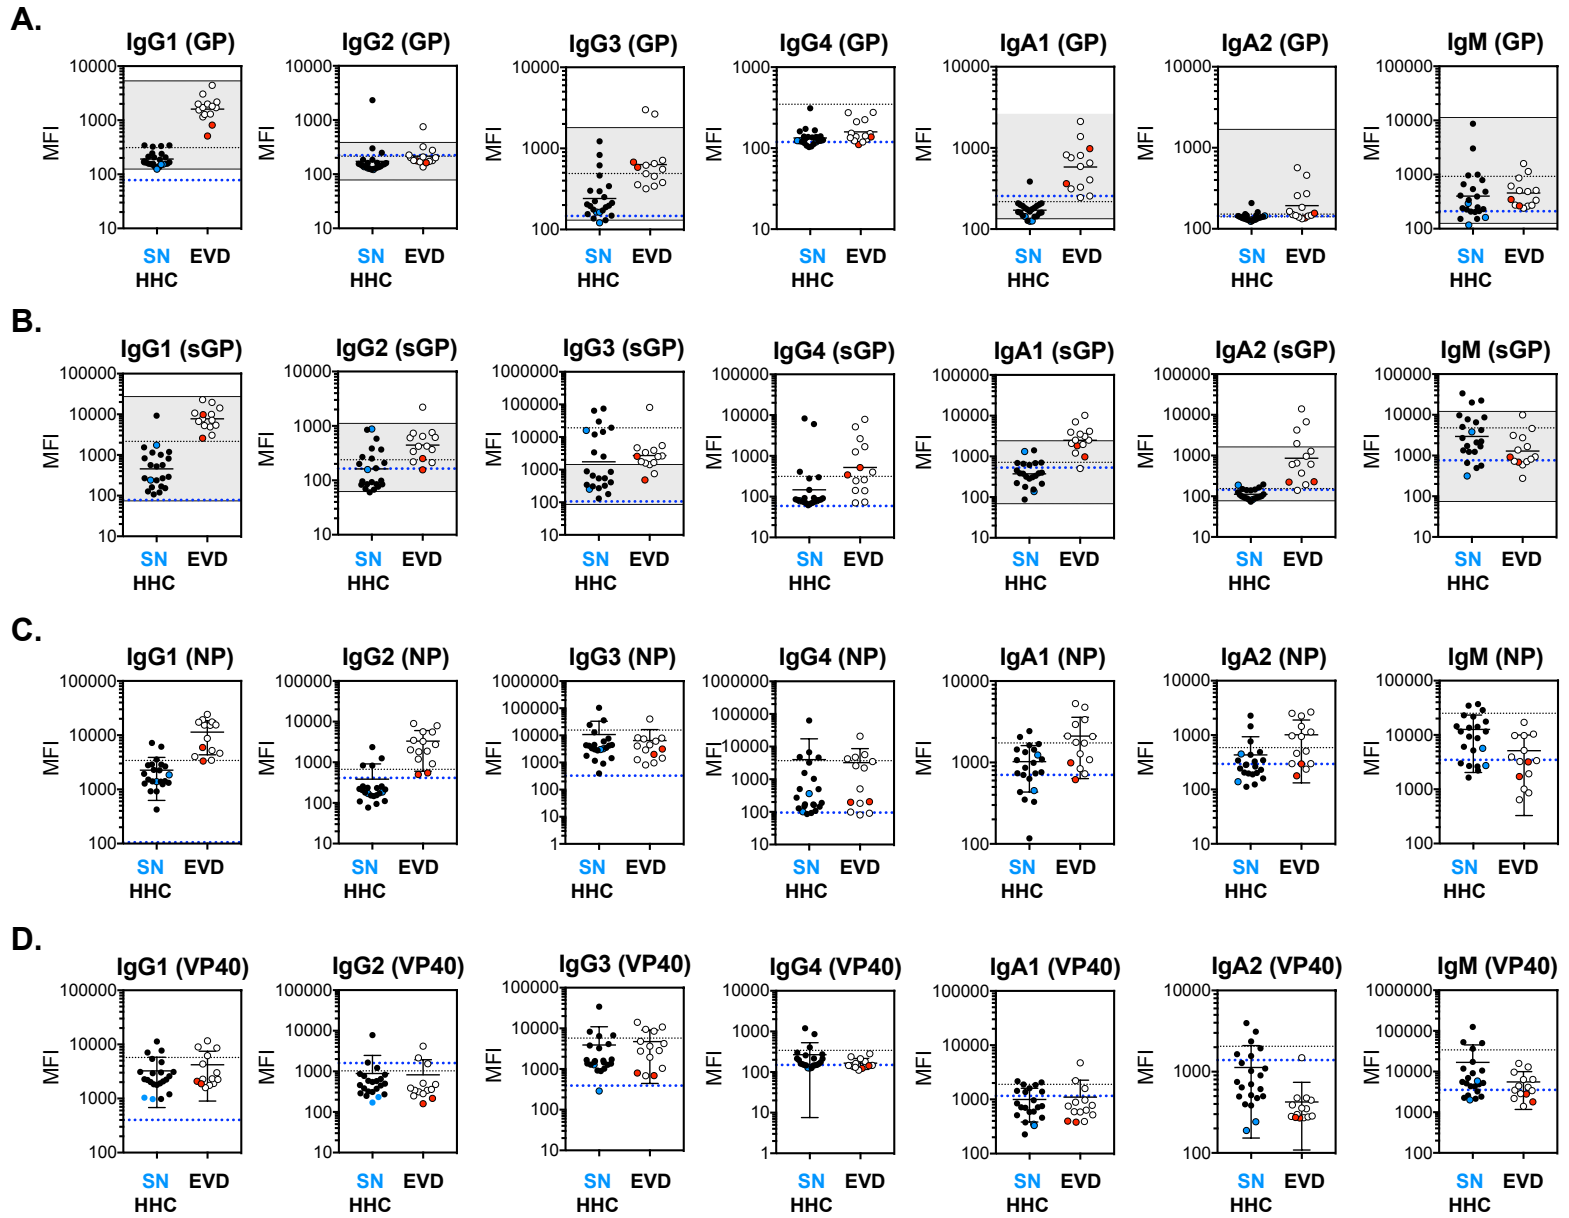

Supplement: jiz364_suppl_supplementary_figure_s1.pdf [file jiz364_suppl_supplementary_figure_s1.pdf]
